# Supplementary material
Source: ML conference proceedings conference paper supplement (https://openreview.net/forum?id=fCNqD2IuoD)
Supplement: supplementary_material [file attachment]

Updated information and entropy values on the HMM dataset reported by the authors of

“Learning Perturbations to Explain Time Series Predictions”

| **Explainer** | **Information** (higher is better) | **Entropy** (lower is better) |
| --- | --- | --- |
| Deep Lift | 3.22E+04 (1.66E+03) | 3.05E+04 (5.69E+02) |
| DynaMask | 1.10E+05 (1.92E+03) | 2.44E+04 (3.84E+02) |
| IG | 3.13E+04 (1.50E+03) | 3.04E+04 (5.44E+02) |
| GradientShap | 2.70E+04 (1.42E+03) | 2.83E+04 (6.20E+02) |
| Fit | 7.79E+04 (5.96E+03) | 3.33E+04 (3.17E+02) |
| Lime | 2.91E+04 (1.55E+03) | 2.87E+04 (6.97E+02) |
| Occlusion | 2.72E+04 (1.04E+03) | 2.83E+04 (4.06E+02) |
| Augmented Occlusion | 3.21E+04 (1.09E+03) | 3.44E+04 (4.56E+02) |
| Retain | 1.68E+04 (1.27E+03) | 2.57E+04 (1.10E+03) |
| **ExtremalMask (Preservation)** | **2.80E+05 (1.21E+04)** | **7.95E+03 (4.748E+02)** |

Table 1: New Information/Entropy results on the HMM experiment.
Results are reported as Average (Std) over 5 runs.

| **Fold** | **Information** (higher is better) | **Entropy** (lower is better) |
| --- | --- | --- |
| 0 | 2.56e+05 | 1.141e+04 |
| 1 | 2.491e+05 | 1.25e+04 |
| 2 | 2.597e+05 | 1.09e+04 |
| 3 | 2.561e+05 | 1.165e+04 |
| 4 | 2.555e+05 | 1.15e+04 |

Table 2: New Information/Entropy results on the HMM experiment for ExtremalMask running the deletion game for 5 folds.
